# Supplementary material for: Influence of various nanoparticle shapes on the interfacial chain mobility: a molecular dynamics simulation
Source: Royal Society of Chemistry journal article supplement (doi:10.1039/c4cp03019b), 2014-08-19
Supplement: c4cp03019b1.pdf [file c4cp03019b1.pdf]

## Supporting Information

### **Influence of various nanoparticle shapes on the interfacial chain mobility: A molecular dynamics simulation**

Yangyang Gao<sup>1,2</sup>, Jun Liu<sup>1,2\*</sup>, Jianxiang Shen<sup>1</sup>, Youping Wu<sup>1</sup>, Liqun Zhang<sup>1,2\*</sup>

<sup>1</sup>Key Laboratory of Beijing City on Preparation and Processing of Novel Polymer Materials and

<sup>2</sup>State Key Laboratory of Organic-Inorganic Composites, Beijing University of Chemical Technology,  
Beijing 100029, People's Republic of China.

---

\* Corresponding author: [zhanglq@mail.buct.edu.cn](mailto:zhanglq@mail.buct.edu.cn) or [liujun@mail.buct.edu.cn](mailto:liujun@mail.buct.edu.cn)

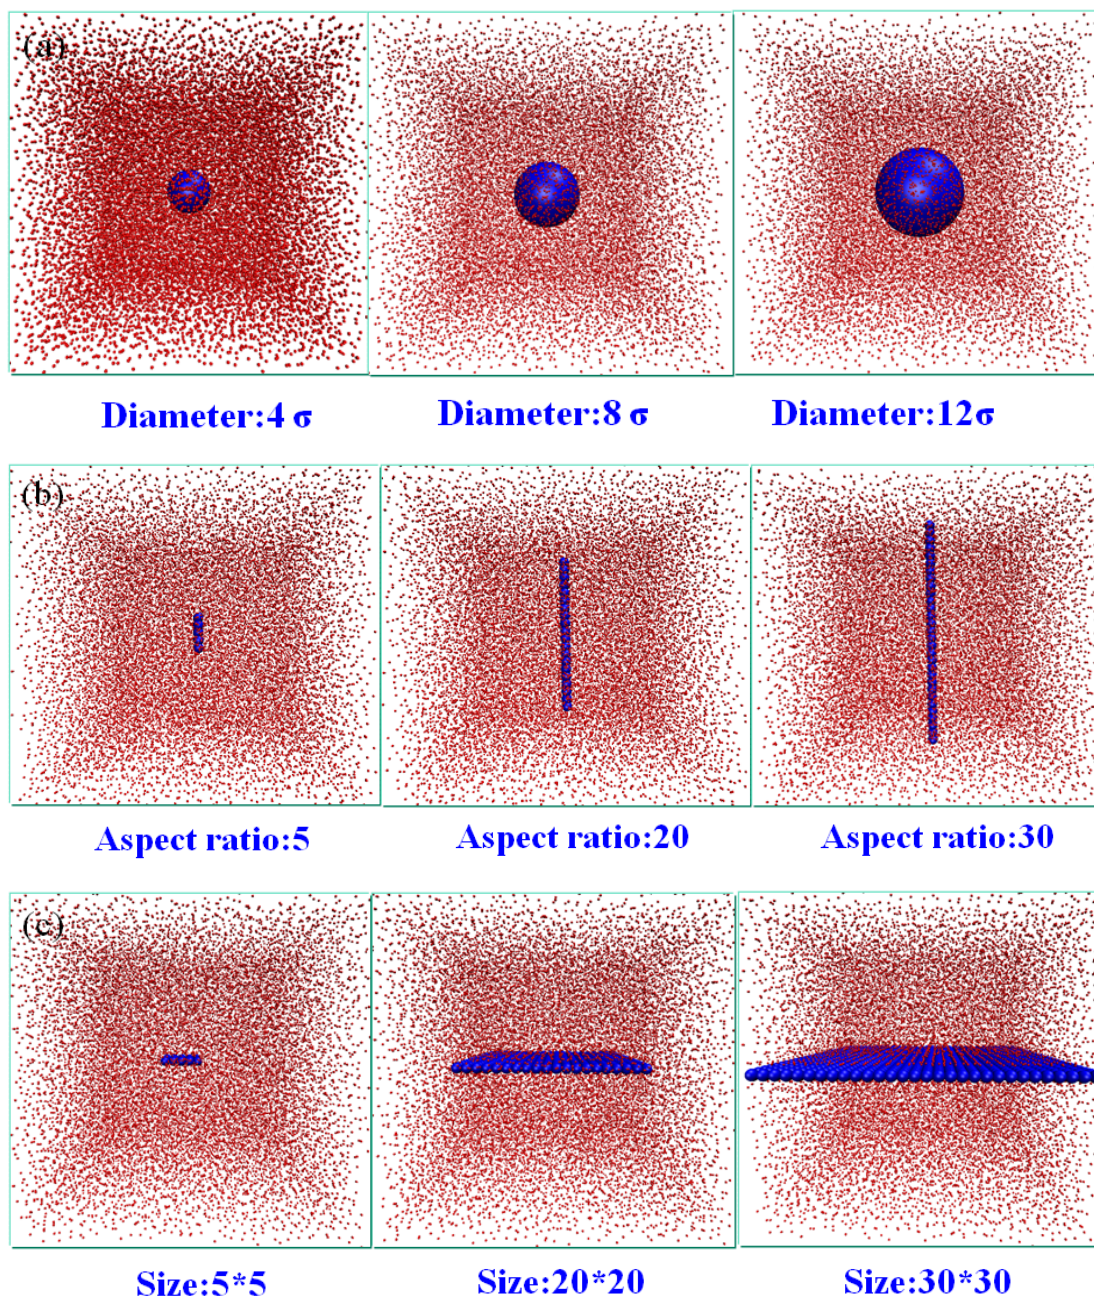

Fig. S1. Some snapshots of initial state for (a) nanosphere, (b) nanorod, (c) nanosheet.

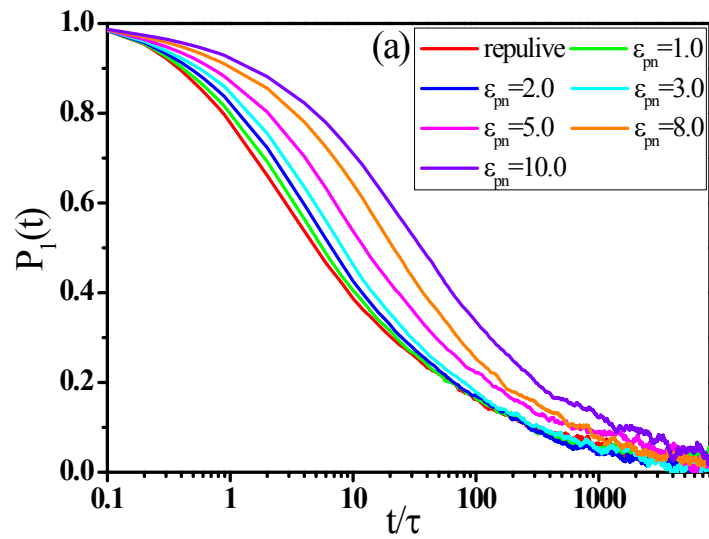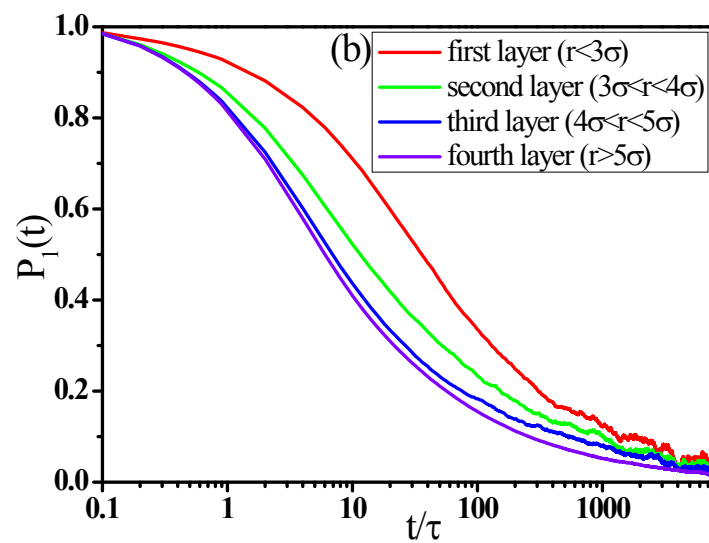

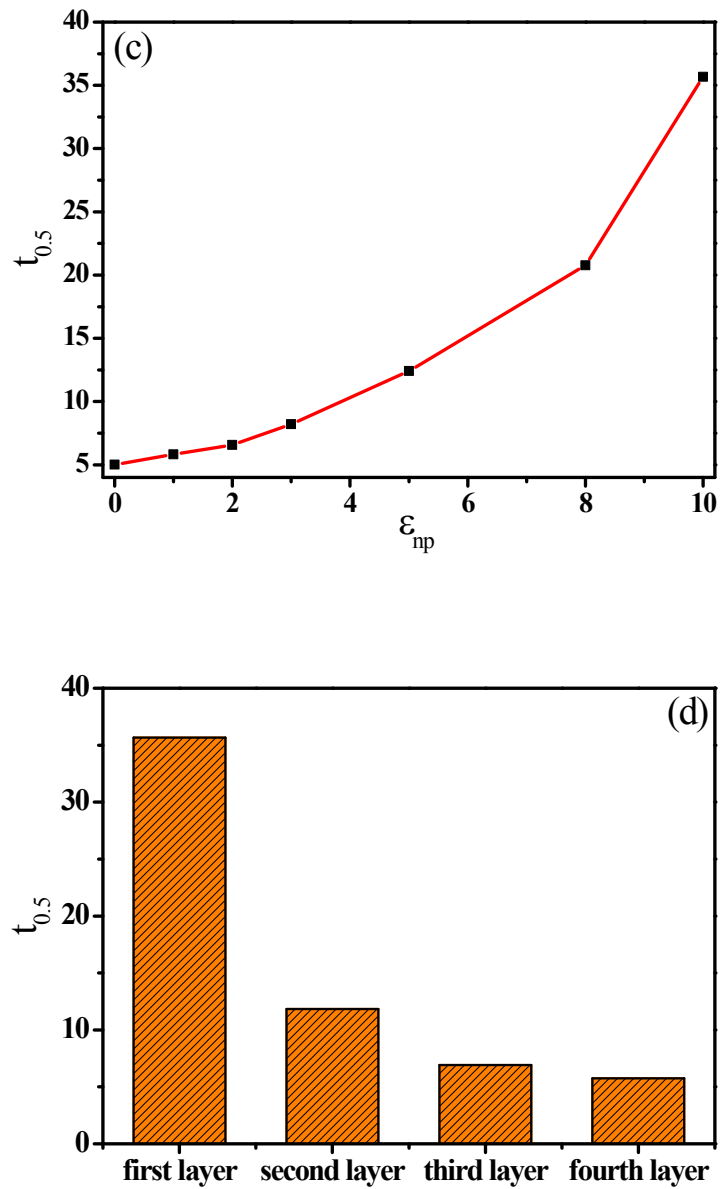

Fig. S2. The decay of the bond-orientation function  $P_1(t)$  (a) in the L1 layers for different interfacial strength and (b) in different layers in the case  $\epsilon_{pn} = 10.0$ . The characteristic relaxation time  $t_{0.5}$  (c) for different polymer-nanoparticle interactions  $\epsilon_{pn}$  and (d) for different layers.

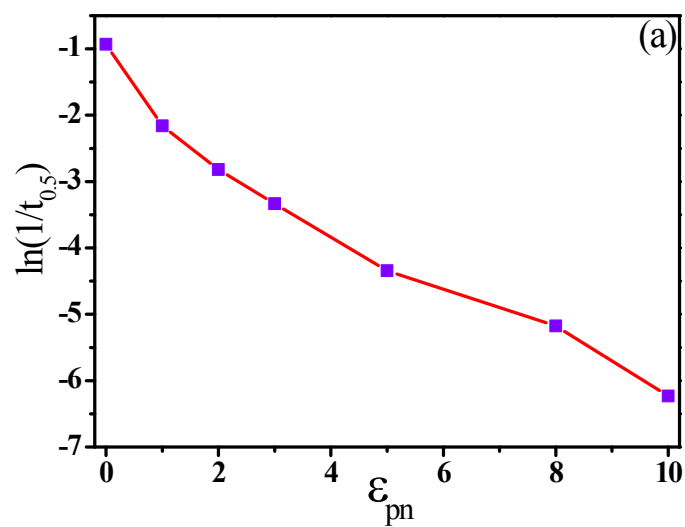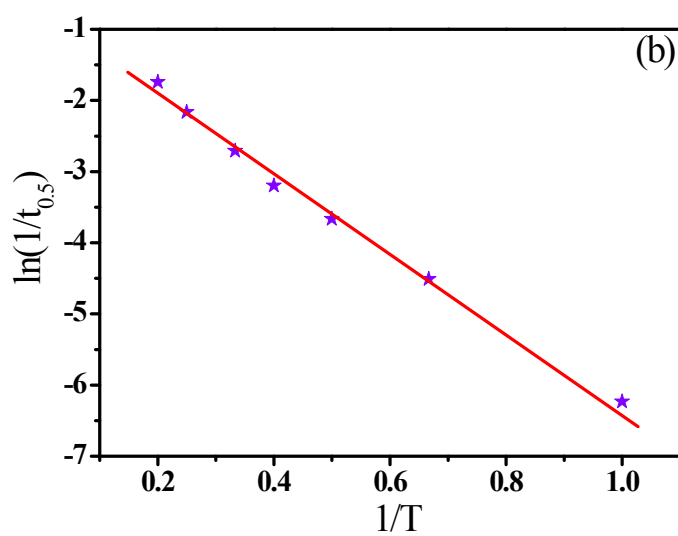

Figure S3. Logarithm of the desorption rate (the inverse of the desorption time  $t_{0.5}$ ) (a) as a function of the polymer-nanoparticle interaction  $\epsilon_{pn}$ . (b) as a function of the inverse of the temperature.

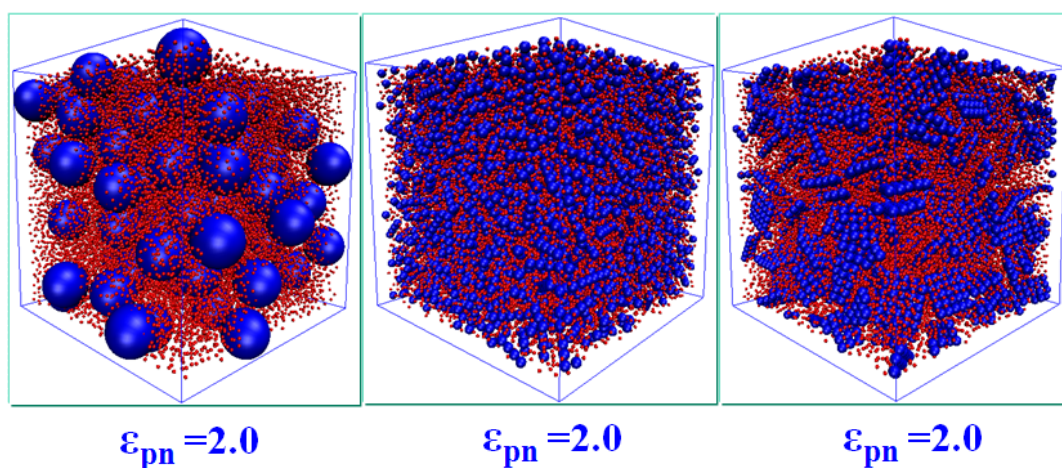

Fig. S4. Snapshots of one system ( $\epsilon_{pn} = 2.0$ ) (a) for nanosphere filled systems. (b) for nanorod filled systems. (c) for nanosheet filled systems.

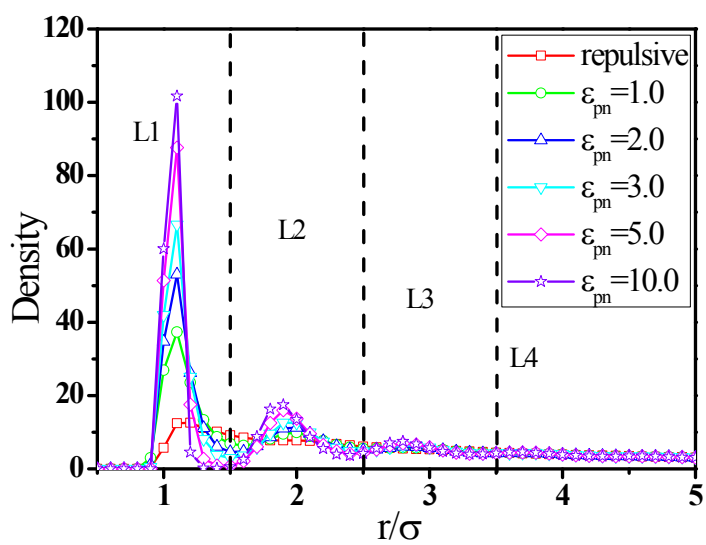

Fig. S5. Density profiles of polymer beads around the nanorod for several interfacial strengths;

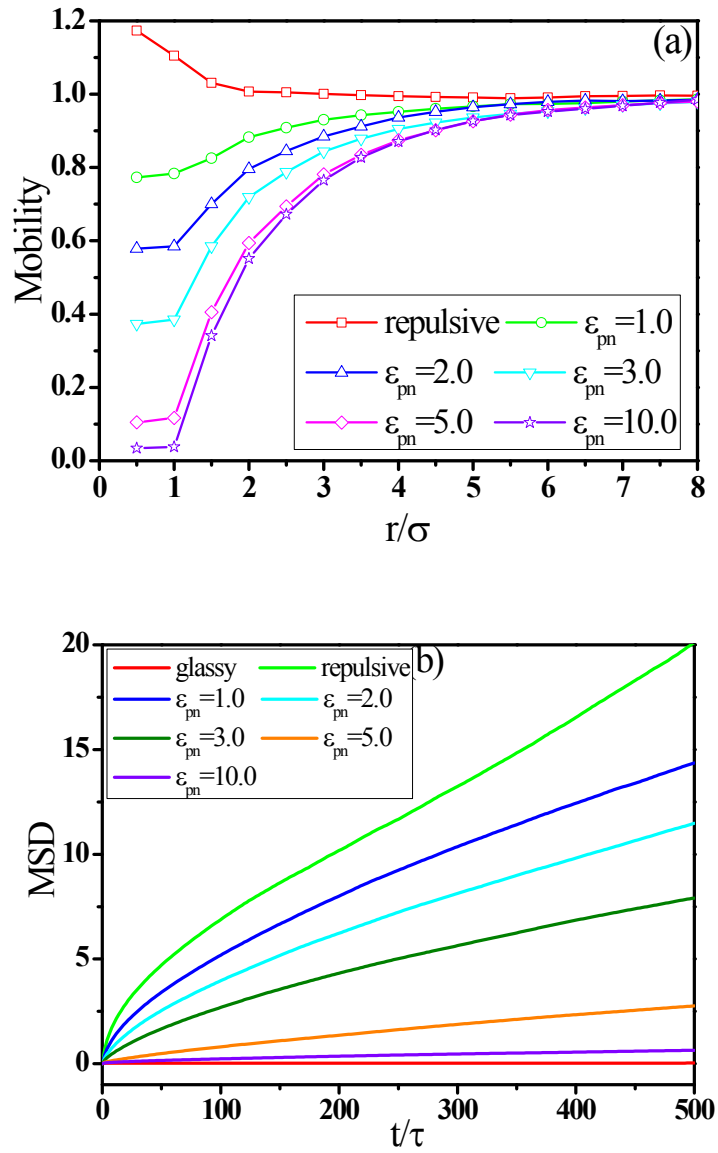

Fig. S6. (a) Mobility of the polymer beads as a function of the distance from the center of nanorod for different polymer-nanorod interactions. (b) Mean square displacement (MSD) averaging for polymer beads in the L1 region. For comparison, the MSD of polymer beads in the glassy state ( $T < T_g$ ) is also shown.

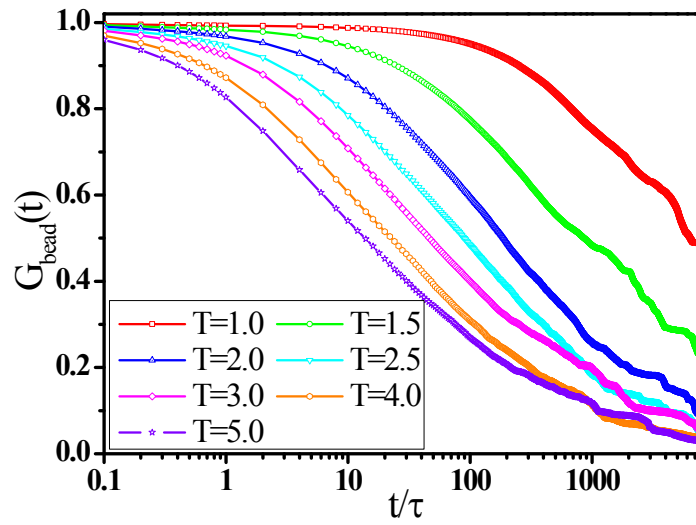

Fig. S7. Decay of  $G_{\text{bead}}(t)$  for different temperatures in the case  $\varepsilon_{pn} = 10.0$ .

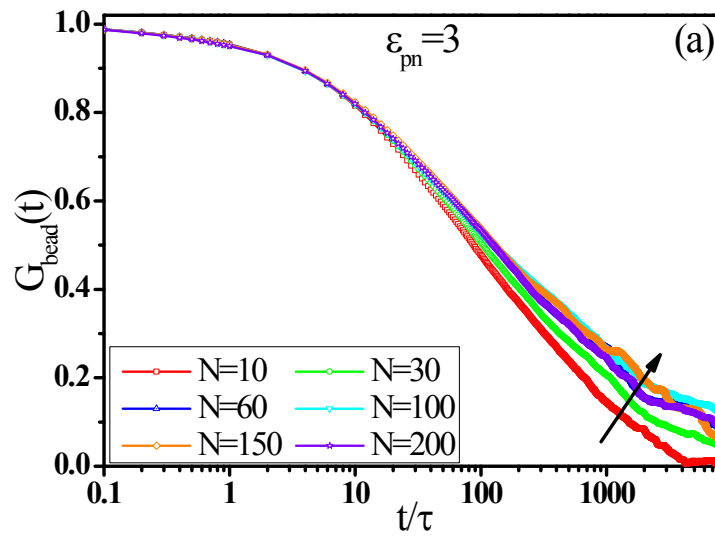

Fig. S8. Decay of  $G_{\text{bead}}(t)$  for different chain lengths in the case  $\varepsilon_{pn} = 3.0$ .



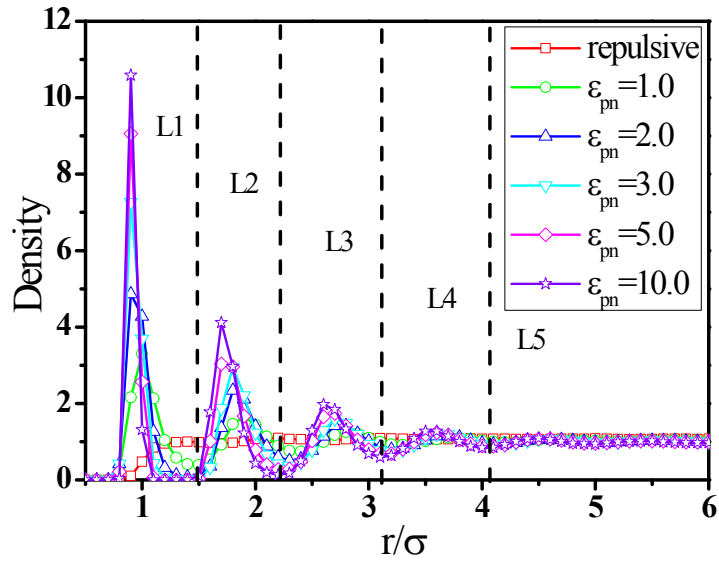

Fig. S9. Density profiles of polymer beads around the nanosheet for several interfacial strengths;

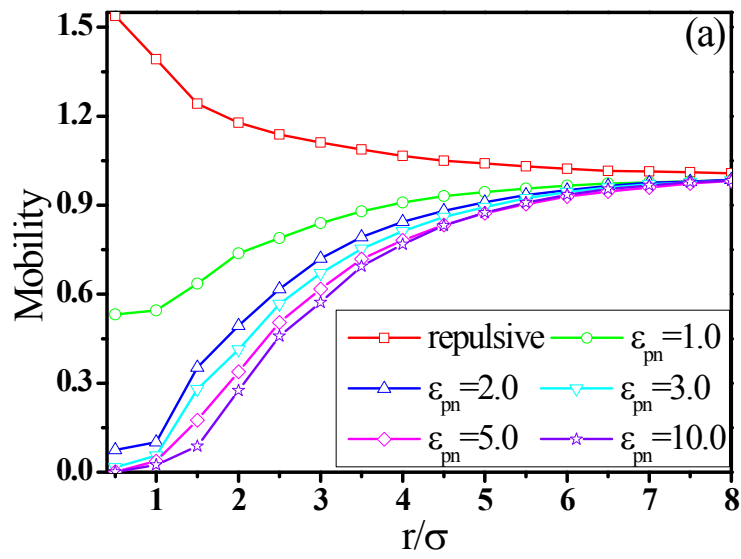

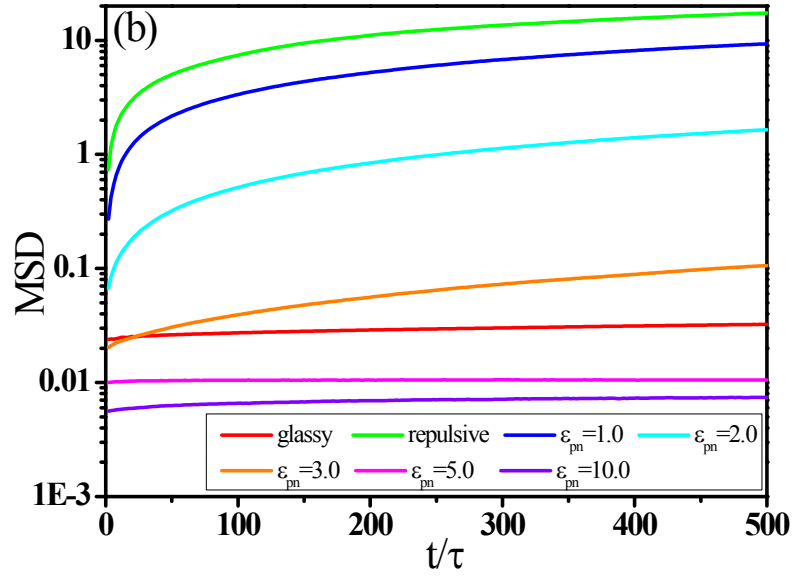

Fig. S10. (a) Mobility of the polymer beads as a function of the distance from the center of nanosheet for different polymer-nanosheet interactions. (b) Mean square displacement (MSD) averaging for polymer beads in the L1 region. For comparison, the MSD of polymer beads in the glassy state ( $T < T_g$ ) is also shown.

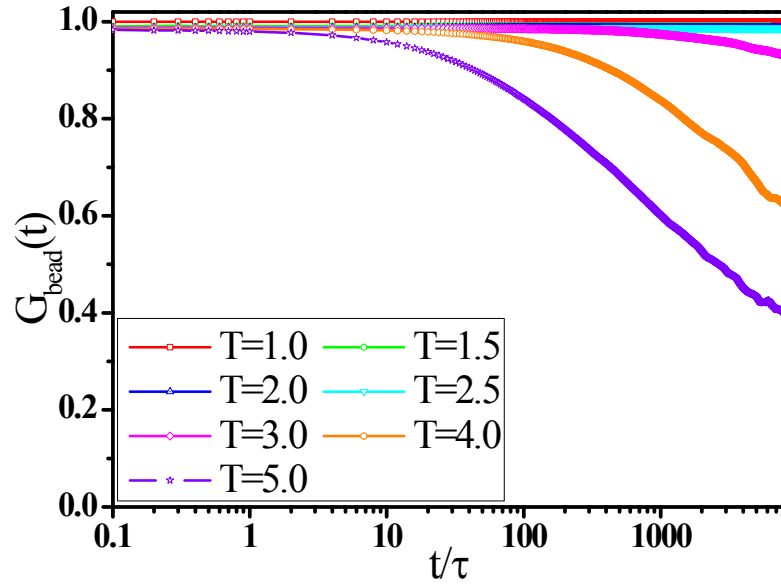

Fig. S11. Decay of  $G_{bead}(t)$  for different temperatures at  $\epsilon_{pn} = 10.0$ .

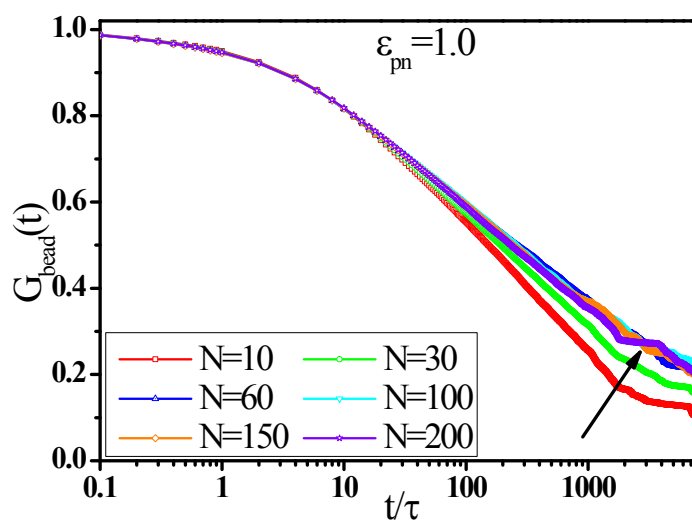

Fig. S12. Decay of  $G_{bead}(t)$  for different chain lengths in the case  $\varepsilon_{pn} = 1.0$ .

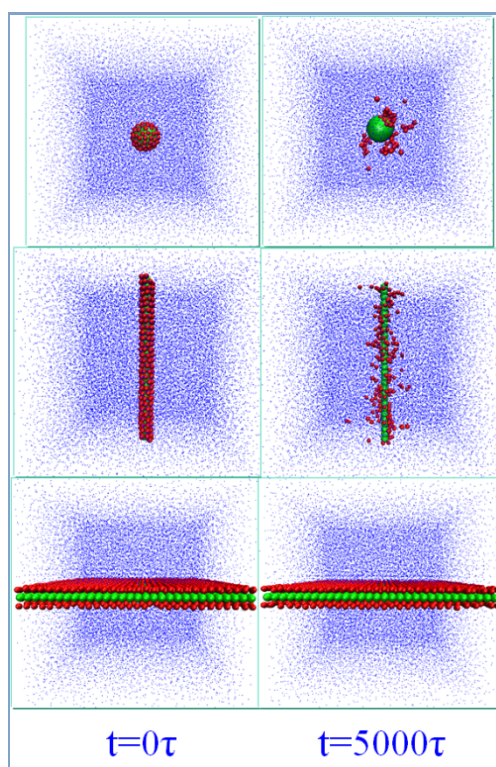

Fig. S13. The snapshots for the kinds of filler filled systems at time  $t = 0\tau$  and  $t = 5000\tau$ . The red spheres denote the interfacial beads, the green beads denote the filler and the blue points denote other polymer. Note  $\varepsilon_{pn} = 10.0$  here.

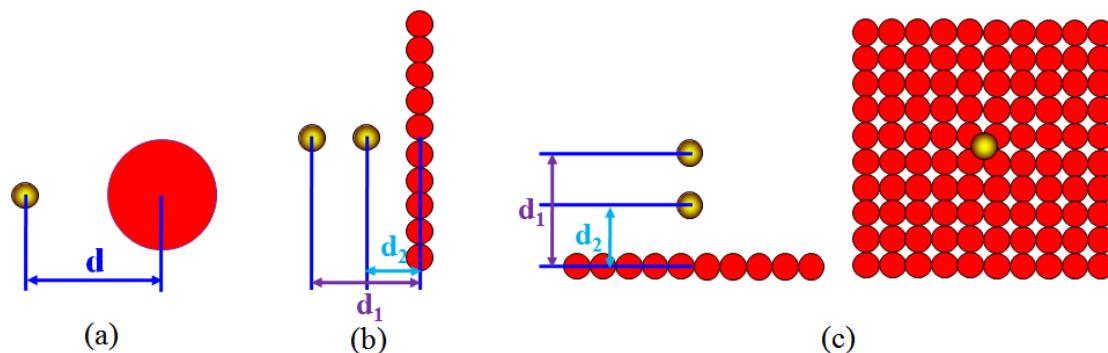

Fig. S14. (a) The red sphere denotes the nanoparticle, the yellow bead denotes polymer monomer and the  $d$  denotes the distance between the polymer bead and nanoparticle center; (b) The red spheres denotes the nanorod, the yellow beads denote polymer monomers and the  $d_1$  and  $d_2$  denote the distance between the polymer beads and nanorod center; (c) The red spheres denotes the nanosheet, the yellow beads denote polymer monomers and the  $d_1$  and  $d_2$  denote the distance between the polymer beads and nanosheet center; The left graph is viewed from the side and the right graph is viewed from the top.

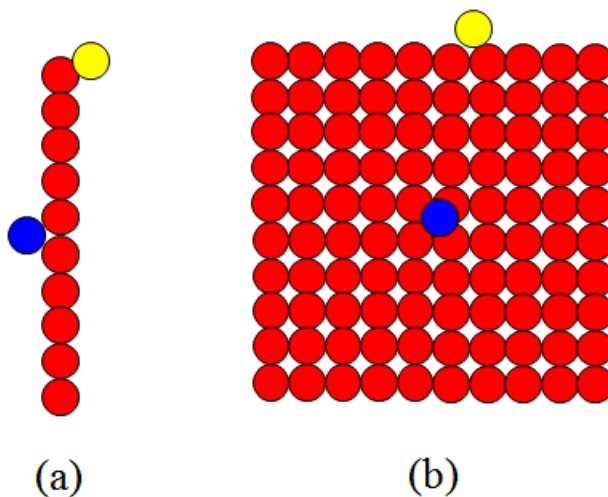

Fig. S15. (a) The red spheres denote the nanorod, the yellow bead and the blue bead denote polymer beads; (b) The red spheres denote the nanosheet, the yellow bead and the blue bead denote polymer beads.

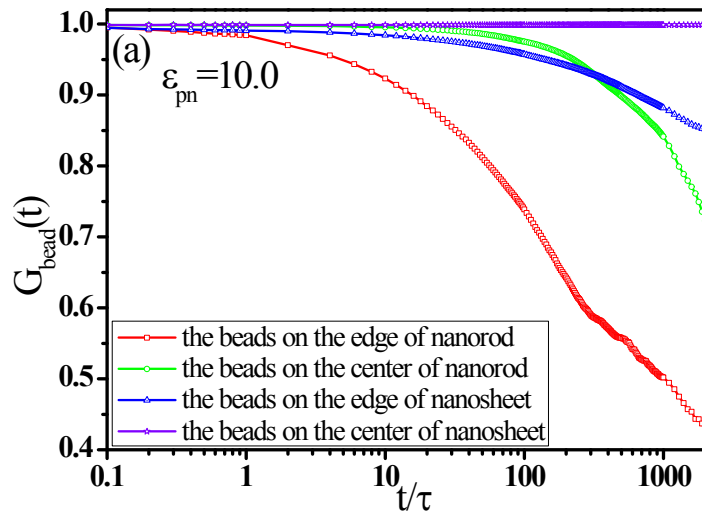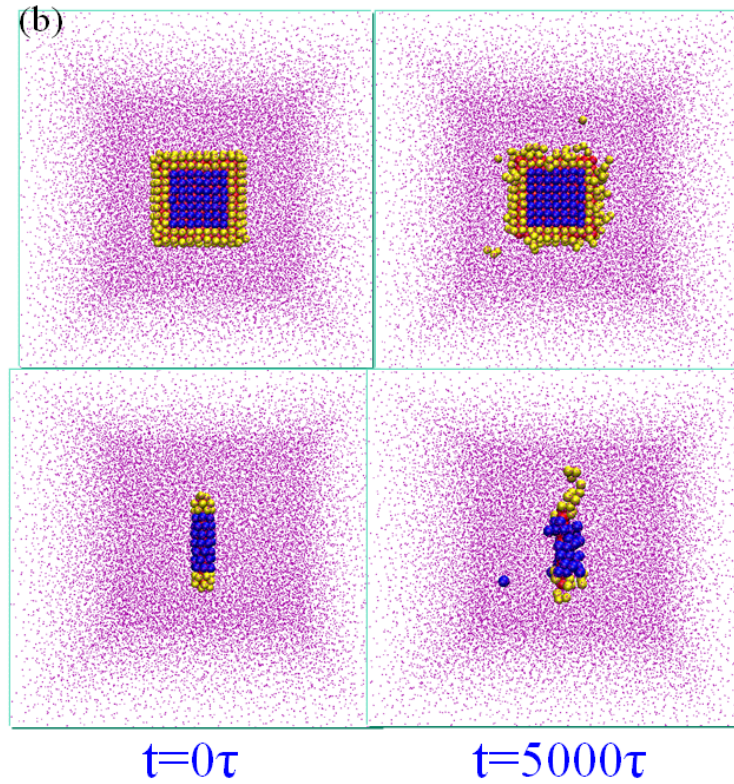

Fig. S16. (a) Decay of  $G_{bead}(t)$  for polymer beads on the edge and center of nanorod and nanosheet in the L1 region at the case. (b) The snapshots for the nanosheet or nanorod filled systems at time  $t = 0\tau$  and  $t = 5000\tau$ . The red spheres denote the nanorod or nanosheet, the yellow bead and the blue beads denote interfacial polymer beads. The purple points denote other polymer. Note  $\varepsilon_{pn} = 10.0$  here.

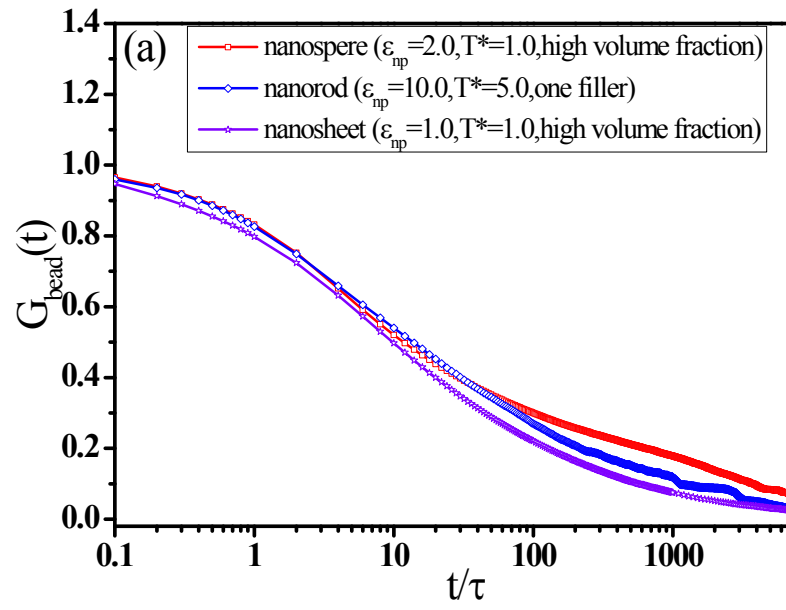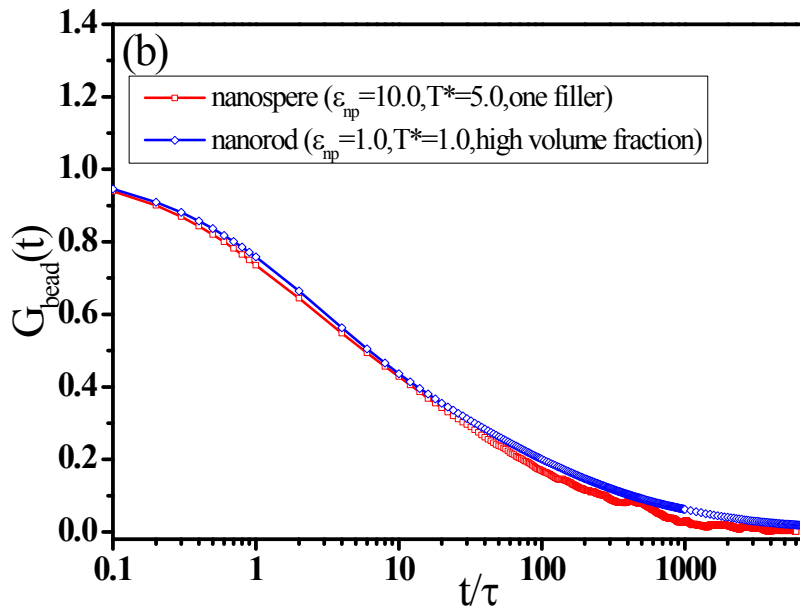

Fig. S17. Decay of  $G_{bead}(t)$  for (a) three different systems, (b) two different systems.

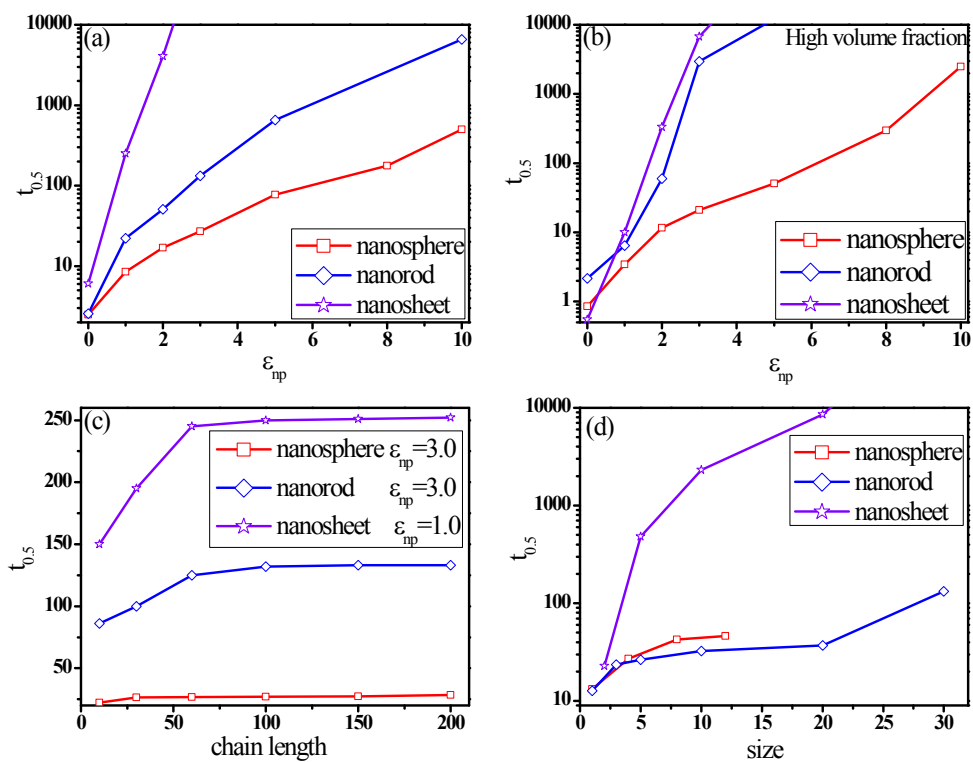

Fig. S18. The effect of (a) the interfacial interaction, (b) volume fraction of filler, (c) chain length and (d) the size of filler on the adsorption/desorption characteristic time  $t_{0.5}$ .
